# Supplementary material for: Function of Polyamines in Regulating Cell Cycle Progression of Cultured Silkworm Cells
Source: MDPI journal article supplement (doi:10.3390/insects12070624), 2021-07-08
Supplement: s1 [file s1]

## Supplementary Information

**Table S1. List of primers used in this study.**

| Gene name      | Sequence (5'-3')                   |
|----------------|------------------------------------|
| BmODC-atg      | AAGGTTGTGGAGGAACAACGCATCAGA        |
| BmODC-R-XhoI   | CCCTCGAGTCACTTGAGCGCACACTCGACG     |
| BmSAMDC-atg    | GCTGAAACGGAGATAATATCAAATAG         |
| BmSAMDC-R-XhoI | CCCTCGAGTCAGCTCGGGAAGTTGCAGTACA    |
| BmSPDS-atg     | GACAAACTAAAAACCAACTGGTTTACGG       |
| BmSPDS-R-XhoI  | CCCTCGAGTCAAGCCAGTTTATATTTTAC      |
| BmSPMS-atg     | TCAGTTCACAATATCTTATTGGATTTCTCG     |
| BmSPMS-R-NotI  | TTGCGGCCGCTTAATCATCTCCAGTTCCTTTG   |
| BmSSAT-atg     | TCTAACAAATATAAAAGCGGTGAAG          |
| BmSSAT-R-XhoI  | CCCTCGAGCTAGCCATCTTTGGCAAAGTCA     |
| BmAPAO-atg     | GGTGACGAAAATTTAGGTTCCAGTGAAAAATG   |
| BmAPAO-R-XhoI  | CCCTCGAGTCACCCTTCCAGCTGTATTCCTTG   |
| BmSMO-atg      | GACGTTATCGTAATAGGCTGCG             |
| BmSMO-R-XhoI   | CCCTCGAGTTATTTTTGGTTAGGTTTGACGTTTG |
| BmODC-F        | TGGAGGAACAACGCATCAGAG              |
| BmODC-R        | CAGGGTGGTCAACAGCAACTT              |
| BmSPDS-F       | TGCTGCCACAAAAATCCA                 |
| BmSPDS-R       | TTCAAAACCGTCACCCAC                 |
| BmSAMDC-F      | CTGCGGCTACTCTATGAA                 |
| BmSAMDC-R      | GATGGTGAGCACGAACTT                 |
| BmSPMS-F       | ACATCCCCATCTCCGACACC               |
| BmSPMS-R       | GGCACGAACGCCATGCTCCT               |
| BmSSAT-F       | TGAGAATGAATGAGCGGC                 |
| BmSSAT-R       | TAAAACGAACAAGCAGGA                 |
| BmAPAO-F       | AGATTGCGGAGGTGGTGA                 |
| BmAPAO-R       | TGGCTGCGAGCGTGTAGG                 |
| BmSMO-F        | TTTTGAGGTCACAGTGGG                 |
| BmSMO-R        | ATTGCCGTGGTAGATAGG                 |
| BmeIF-4a-F     | TTCGTACTGGCTCTTCTCGT               |
| BmeIF-4a-R     | CAAAGTTGATAGCAATTCCT               |

|              |                        |
|--------------|------------------------|
| BmCyclinA-F  | TGCGGAGCTGTGCCTACT     |
| BmCyclinA-R  | ATTGCGGGTTGACCTTGC     |
| BmCyclinB-F  | ATTGACAGATATTTGCAGGTTG |
| BmCyclinB-R  | GACAGAAGCCCAGTTTGC     |
| BmCyclinB3-F | GCTCGTGTATCAATGCCTAC   |
| BmCyclinB3-R | GCTAATGCAATCGGGAGA     |
| BmCyclinD-F  | GTTTCGTCAGTGTCATCCG    |
| BmCyclinD-R  | GTTAAGGTGAGGGCGTGT     |
| BmCyclinE-F  | GTCCCTTGCCTGGATTGT     |
| BmCyclinE-R  | ATTGCCGTGGTAGATAGG     |

---
